# Supplementary material for: Photocatalytic Degradation of Inherent Pharmaceutical Concentration Levels in Real Hospital WWTP Effluents Using g-C3N4 Catalyst on CPC Pilot Scale Reactor
Source: MDPI journal article supplement (doi:10.3390/molecules28031170), 2023-01-25
Supplement: s1 [file s1]

## SUPPLEMENTARY INFORMATION

**Table S1.** Chemical structure, molecular weight, solubility in water (gL<sup>-1</sup>), pKa and LogK<sub>ow</sub> of pharmaceuticals detected in the WWTP secondary effluents.

| Pharmaceutical          | Chemical structure <sup>[a]</sup>                                                   | M.W.    | Solubility in water (gL <sup>-1</sup> ) <sup>[a]</sup> | pK <sub>a</sub> <sup>[a]</sup> | LogK <sub>ow</sub> <sup>[b]</sup> |
|-------------------------|-------------------------------------------------------------------------------------|---------|--------------------------------------------------------|--------------------------------|-----------------------------------|
| Amisulpride             | 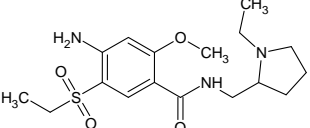   | 369.480 | 0.293                                                  | 9.37                           | 1.10                              |
| Atenolol                |    | 266.341 | 26.50                                                  | 9.6                            | 0.16                              |
| Carbamazepine           |    | 236.269 | 0.152                                                  | 13.9 / 15.96 <sup>[c]</sup>    | 2.45                              |
| Citalopram              |    | 324.392 | 0.031                                                  | 9.78                           | 3.74                              |
| Mirtazapine             |   | 265.352 | 1.10                                                   | 7.7                            | 3.03                              |
| O-desmethyl venlafaxine |  | 263.375 | 3.70                                                   | 9.45 / 10.66                   | 2.72                              |
| Quetiapine              |  | 383.507 | 0.5869                                                 | 2.78/7.46                      | 1.94                              |
| Trimethoprim            |  | 290.323 | 0.40                                                   | 7.12                           | 0.91                              |
| Valsartan               |  | 435.528 | 0.0014                                                 | 3.6/4.73                       | 4.00                              |
| Venlafaxine             |  | 277.401 | 0.267                                                  | 10.09                          | 3.28                              |

Literature data from: [a] Data provided by PubChem; [b] Data calculated by US Environmental Protection Agency's EPISuite™, available on ChemSpider; [c] Data calculated by ChemAxon, available on ChemSpider.
